# Supplementary material for: Cross-Reactive Antibodies to SARS-CoV-2 and MERS-CoV in Pre-COVID-19 Blood Samples from Sierra Leoneans
Source: MDPI journal article supplement (doi:10.3390/v13112325), 2021-11-21
Supplement: s1 [file s1]

## SUPPLEMENTAL MATERIAL

# Cross-reactive antibodies to SARS-CoV-2 and MERS-CoV in pre-COVID-19 blood samples from Sierra Leoneans

Rodrigo Borrega <sup>1,†</sup>, Diana K. S. Nelson <sup>2,†</sup>, Anatoliy P. Koval <sup>1,†</sup>, Nell G. Bond <sup>3,†</sup>, Megan L. Heinrich <sup>1,\*</sup>, Megan M. Rowland <sup>1</sup>, Raju Lathigra <sup>1</sup>, Duane J. Bush <sup>2</sup>, Irina Aimukanova <sup>2</sup>, Whitney N. Phinney <sup>2</sup>, Sophia A. Koval <sup>1</sup>, Andrew R. Hoffmann <sup>3</sup>, Allison R. Smither <sup>3</sup>, Antoinette R. Bell-Kareem <sup>3</sup>, Lilia I. Melnik <sup>3</sup>, Kaylynn J. Genemaras <sup>3,4</sup>, Karissa Chao <sup>3,4</sup>, Patricia Snarski <sup>5,6</sup>, Alexandra B. Melton <sup>7</sup>, Jaikin E. Harrell <sup>3</sup>, Ashley A. Smira <sup>8</sup>, Debra H. Elliott <sup>8</sup>, Julie A. Rouelle <sup>8</sup>, Gilberto Sabino-Santos, Jr. <sup>9,10</sup>, Arnaud C. Drouin <sup>11</sup>, Mambu Momoh <sup>12,13,14</sup>, John Demby Sandi <sup>13</sup>, Augustine Goba <sup>13</sup>, Robert J. Samuels <sup>13</sup>, Lansana Kanneh <sup>13</sup>, Michael Gbokie <sup>13</sup>, Zoe L. Branco <sup>1</sup>, Jeffrey G. Shaffer <sup>15</sup>, John S. Schieffelin <sup>8,16</sup>, James E. Robinson <sup>8</sup>, Dahlene N. Fusco <sup>11</sup>, Pardis C. Sabeti <sup>17,18,19,20,21,22</sup>, Kristian G. Andersen <sup>23,24</sup>, Donald S. Grant <sup>13,14,\*</sup>, Matthew L. Boisen <sup>2,\*</sup>, Luis M. Branco <sup>1,\*</sup> and Robert F. Garry <sup>1,2,3\*</sup>

<sup>1</sup> Zalgen Labs, LCC, Germantown, MD 20876 USA rborrega@zalgenlabs.com (R.B.); akoval@zalgenlabs.com (A.P.K.); mrowland@zalgenlabs.com (M.M.R.); rlathigra@zalgenlabs.com (R.L.); sophia.koval@gmail.com (S.A.K.); zbranco@zalgenlabs.com (Z.L.B.)

<sup>2</sup> Zalgen Labs, LCC, Broomfield, CO 80045, USA; dnelson@zalgenlabs.com (D.K.S.N.); dbush@zalgenlabs.com (D.J.B.); iaimukanova@zalgenlabs.com (I.A.); wphinney@zalgenlabs.com (W.N.P.)

<sup>3</sup> Department of Microbiology and Immunology, School of Medicine, Tulane University, New Orleans, LA 70112, USA; nbond@tulane.edu (N.G.B.); ahoffman@tulane.edu (A.R.H.); asmither@tulane.edu (A.R.S.); abell13@tulane.edu (A.R.B.-K.); lmelnik@tulane.edu (L.I.M.); kgenemar@tulane.edu (K.J.G.); kchao1@tulane.edu (K.C.); jharrel3@tulane.edu (J.E.H.)

<sup>4</sup> Bioinnovation Program, Tulane University, New Orleans, LA 70118, USA

<sup>5</sup> Heart and Vascular Institute, John W. Deming Department of Medicine, School of Medicine, Tulane University, New Orleans, LA 70112, USA; psnarski@tulane.edu

<sup>6</sup> Department of Physiology, School of Medicine, Tulane University, New Orleans, LA 70112, USA

<sup>7</sup> Department of Microbiology, Tulane National Primate Research Center, Covington, LA 70433, USA; amelton@tulane.edu

<sup>8</sup> Department of Pediatrics, School of Medicine, Tulane University, New Orleans, LA, 70112 USA;

areyna@tulane.edu (A.A.S.); dholt@tulane.edu (D.H.E.); jrouelle@tulane.edu (J.A.R.);

jschieff@tulane.edu (J.S.S.); jrobinso@tulane.edu (J.E.R.)

<sup>9</sup> Department of Tropical Medicine, School of Public Health and Tropical Medicine, Tulane University, New Orleans, LA 70112, USA; gsabino@tulane.edu

<sup>10</sup> Centre for Virology Research, Ribeirão Preto Medical School, University of Sao Paulo, Ribeirão Preto 14049900, SP, Brazil

<sup>11</sup> Department of Medicine, School of Medicine, Tulane University, New Orleans, LA 70112, USA; adrouin@tulane.edu (A.C.D.); dfusco@tulane.edu (D.N.F.)

<sup>12</sup> Eastern Polytechnic Institute, Kenema, Sierra Leone; mmomoh@tulane.edu

<sup>13</sup> Viral Hemorrhagic Fever Program, Kenema Government Hospital, Kenema, Sierra Leone; johnatsandi@gmail.com (J.D.S.); augstgoba@yahoo.com (A.G.); robert.j.samuels@vanderbilt.edu (R.J.S.); lansanakanneh@gmail.com (L.K.); gbakiemichael@gmail.com (M.G.)

<sup>14</sup> Ministry of Health and Sanitation, Freetown, Sierra Leone

<sup>15</sup> Department of Biostatistics and Data Science, School of Public Health and Tropical Medicine, Tulane University, New Orleans, LA 70112, USA; jshaffer@tulane.edu

<sup>16</sup> Department of Internal Medicine, School of Medicine, Tulane University, New Orleans, LA, USA

<sup>17</sup> Broad Institute of Massachusetts Institute of Technology (MIT) and Harvard, Cambridge, MA 02142, USA; pardis@broadinstitute.org

<sup>18</sup> Howard Hughes Medical Institute, Chevy Chase, MD 20815, USA

<sup>19</sup> Department of Organismic and Evolutionary Biology, Harvard University, Cambridge, MA 02138, USA

<sup>20</sup> Department of Immunology and Infectious Diseases, Harvard T.H. Chan School of Public Health, Harvard University, Boston, MA 02115, USA

<sup>21</sup> Department of Medicine, Division of Infectious Diseases, Massachusetts General Hospital, Boston, MA 02114, USA

<sup>22</sup> Massachusetts Consortium on Pathogen Readiness, Boston, MA 02115, USA

<sup>23</sup> Department of Immunology and Microbial Science, Scripps Research, La Jolla, CA 92037, USA; kga1978@gmail.com

<sup>24</sup> Scripps Research Translational Institute, La Jolla, CA 92037, USA

\* Correspondence: donkumfel@yahoo.co.uk (D.S.G.); mboisen@zalgenlabs.com (M.L.B.); lbranco@zalgenlabs.com (L.M.B.); rfgarry@tulane.edu (R.F.G.)

† These authors equally contributed to this work.



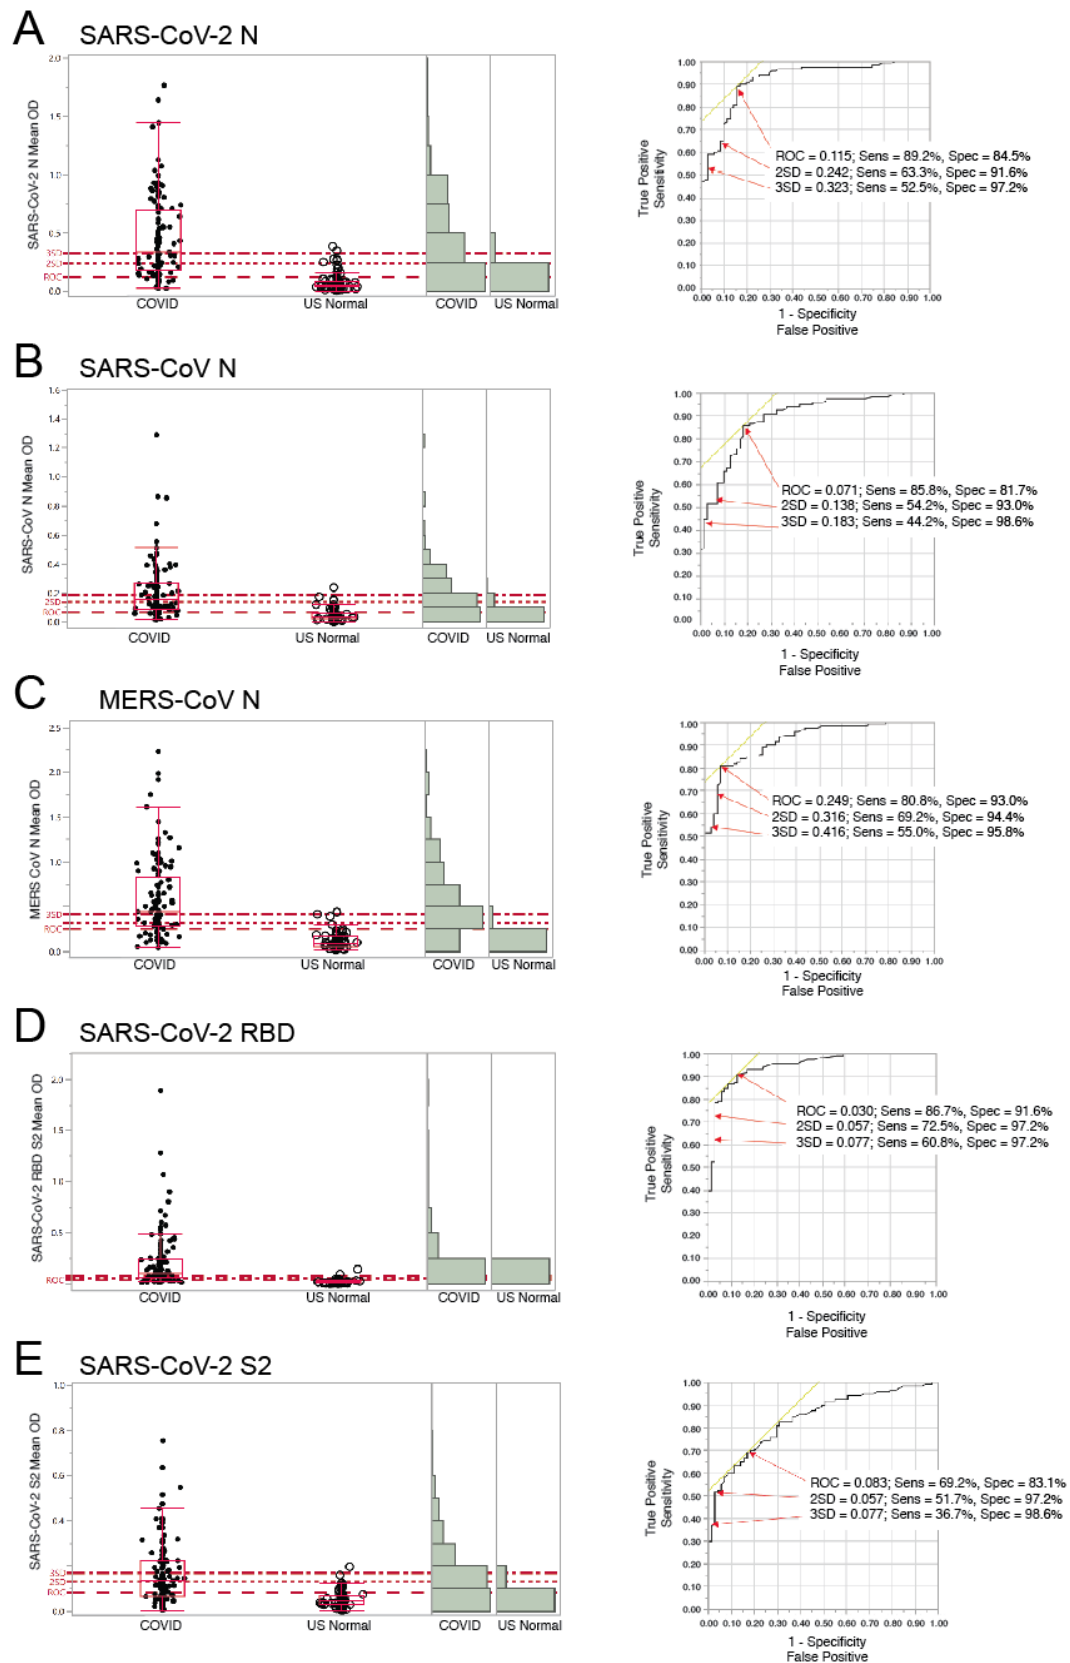

**Figure S2.** Dot plots and Receiver Operator Characteristic curves. Data used to calculate cut-offs used for coronavirus ELISAs are depicted. Panel A: SARS-CoV-2 N. Panel B: SARS-CoV N. Panel C: MERS-CoV N. Panel D: SARS-CoV-2 RBD. Panel E: SARS-CovV-2 S2 Spike subunit.

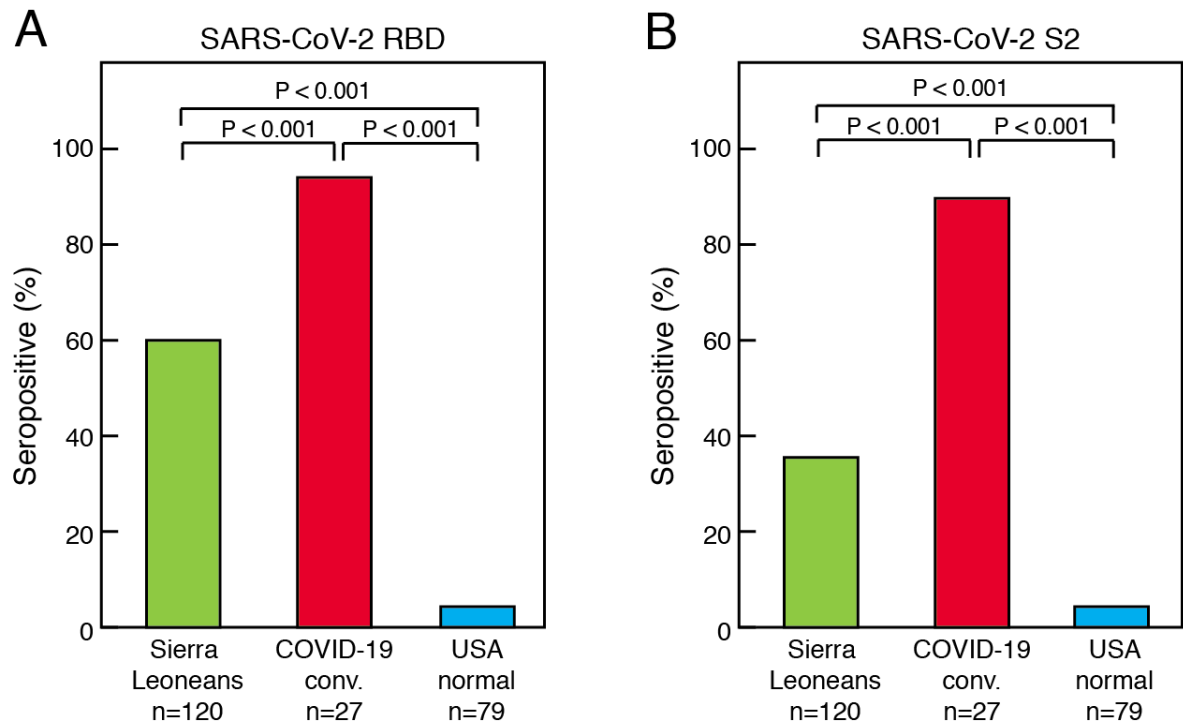

**Figure S3.** Serological responses to coronavirus antigens by Sierra Leoneans, COVID-19 subjects and United States normal blood donors. Percent positive results for the indicated coronavirus proteins for the three cohorts are shown. Panel A: SARS-CoV-2 RBD. Panel B: SARS-CoV-2 S2 Spike subunit.

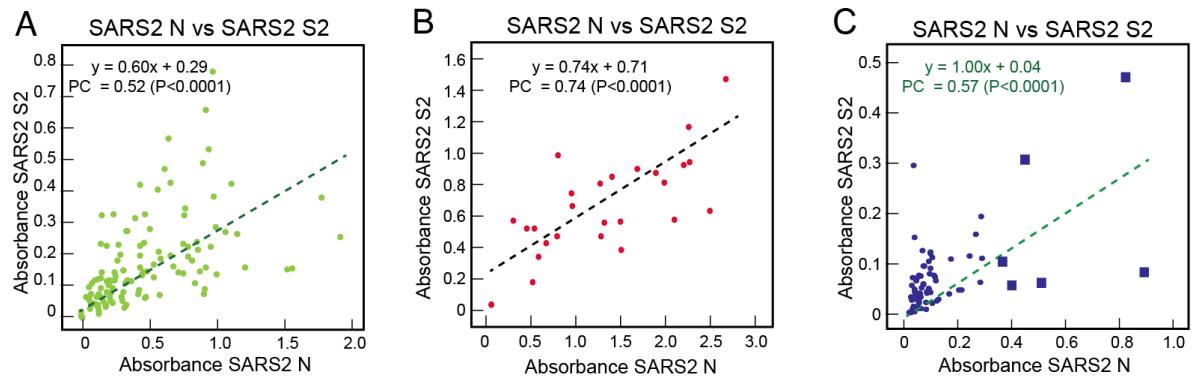

**Figure S4.** Correlations for SARS-CoV-2 N versus SARS-CoV2 S2 subunit of spike in Sierra Leoneans, COVID subjects, and healthy blood donors. Panel A: Pre-pandemic Sierra Leoneans. Panel B: COVID-19 subjects. Panel C; United States normal blood donors.

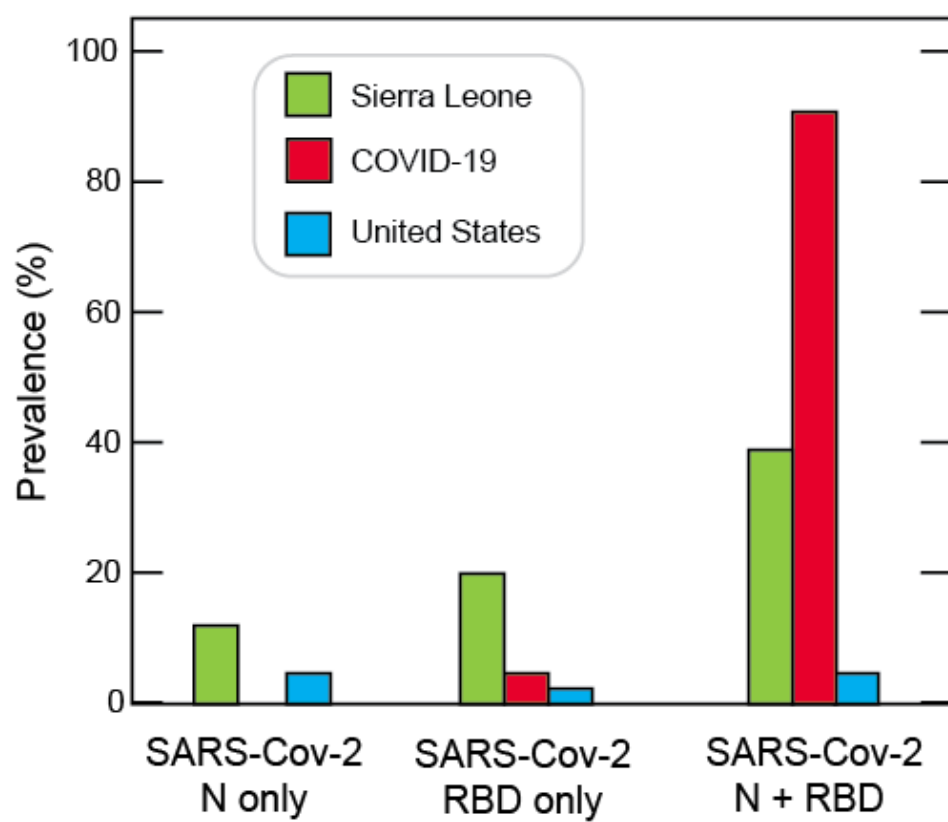

Figure S5. Reactivities to N or S or both in Sierra Leoneans, COVID survivors, and healthy blood donors.



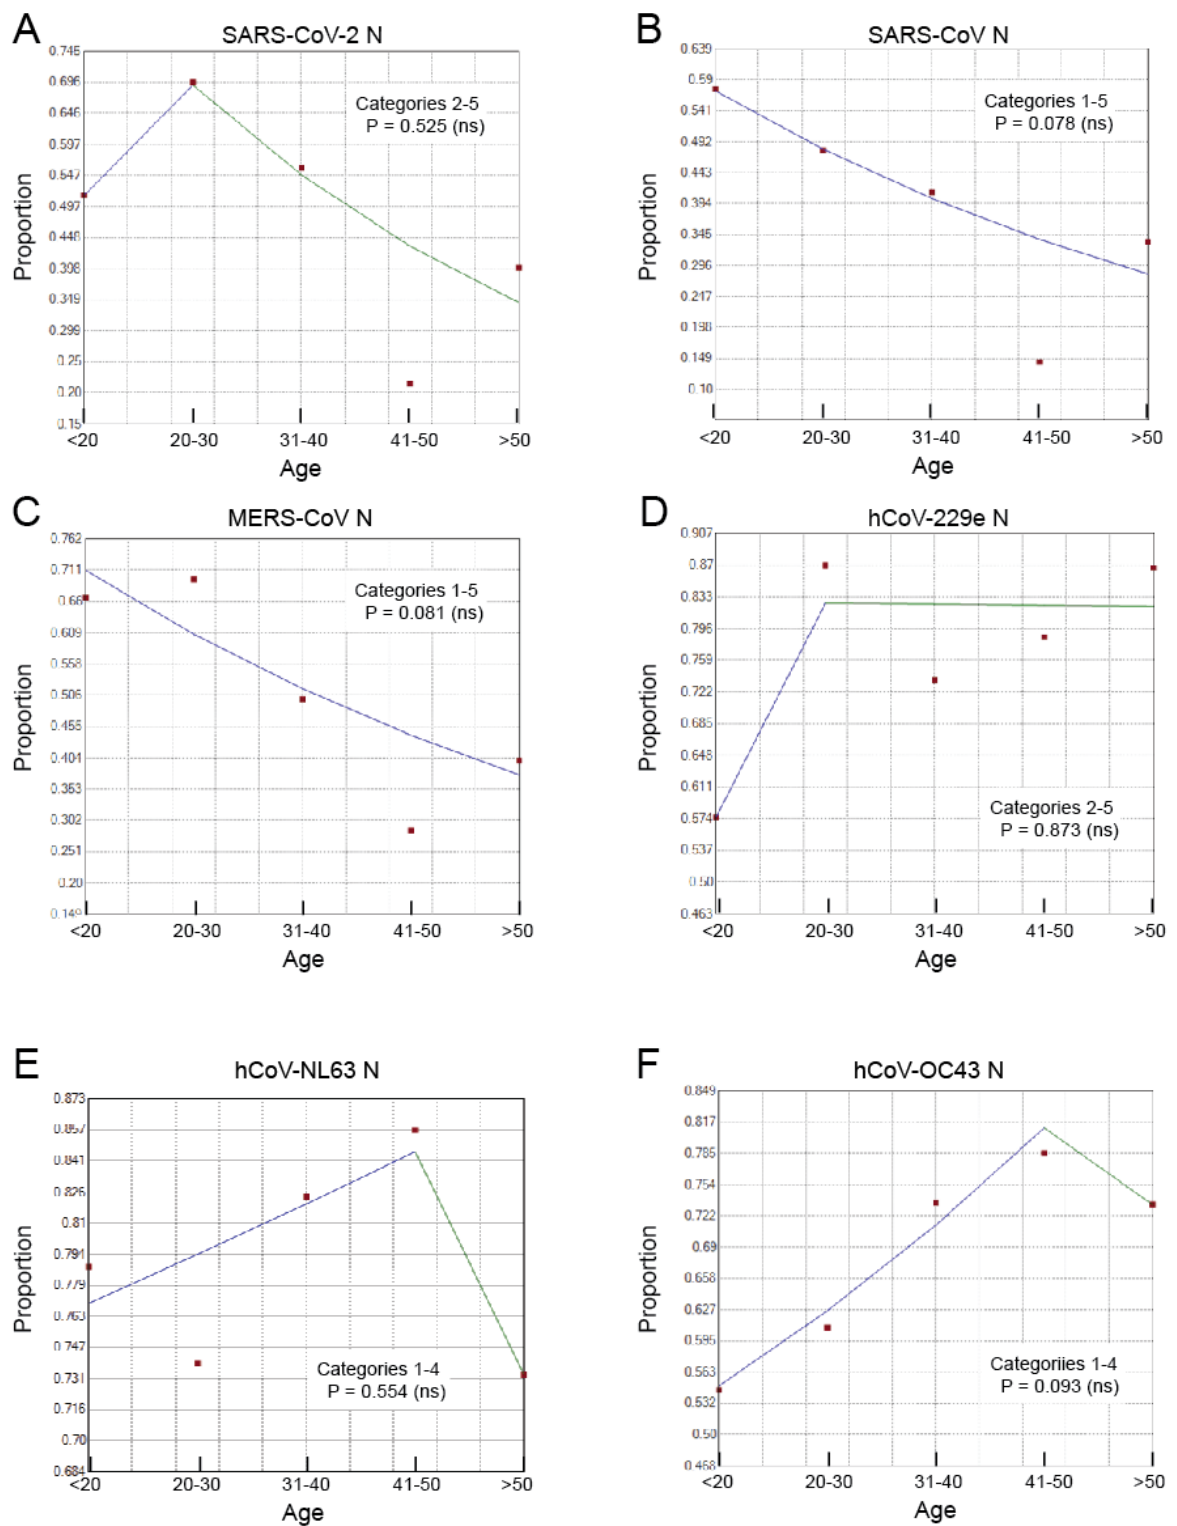

**Figure S6.** Coronavirus reactivity by age in Sierra Leoneans. JoinPoint regression analyses for seroreactivity to the indicated coronavirus N was performed. Panel A: SARS-CoV-2 N. Panel B: SARS-CoV N. Panel C: MERS-CoV N. Panel D: hCoV-229E. Panel E: hCoV-NL63. Panel F: hCoV-OC43.

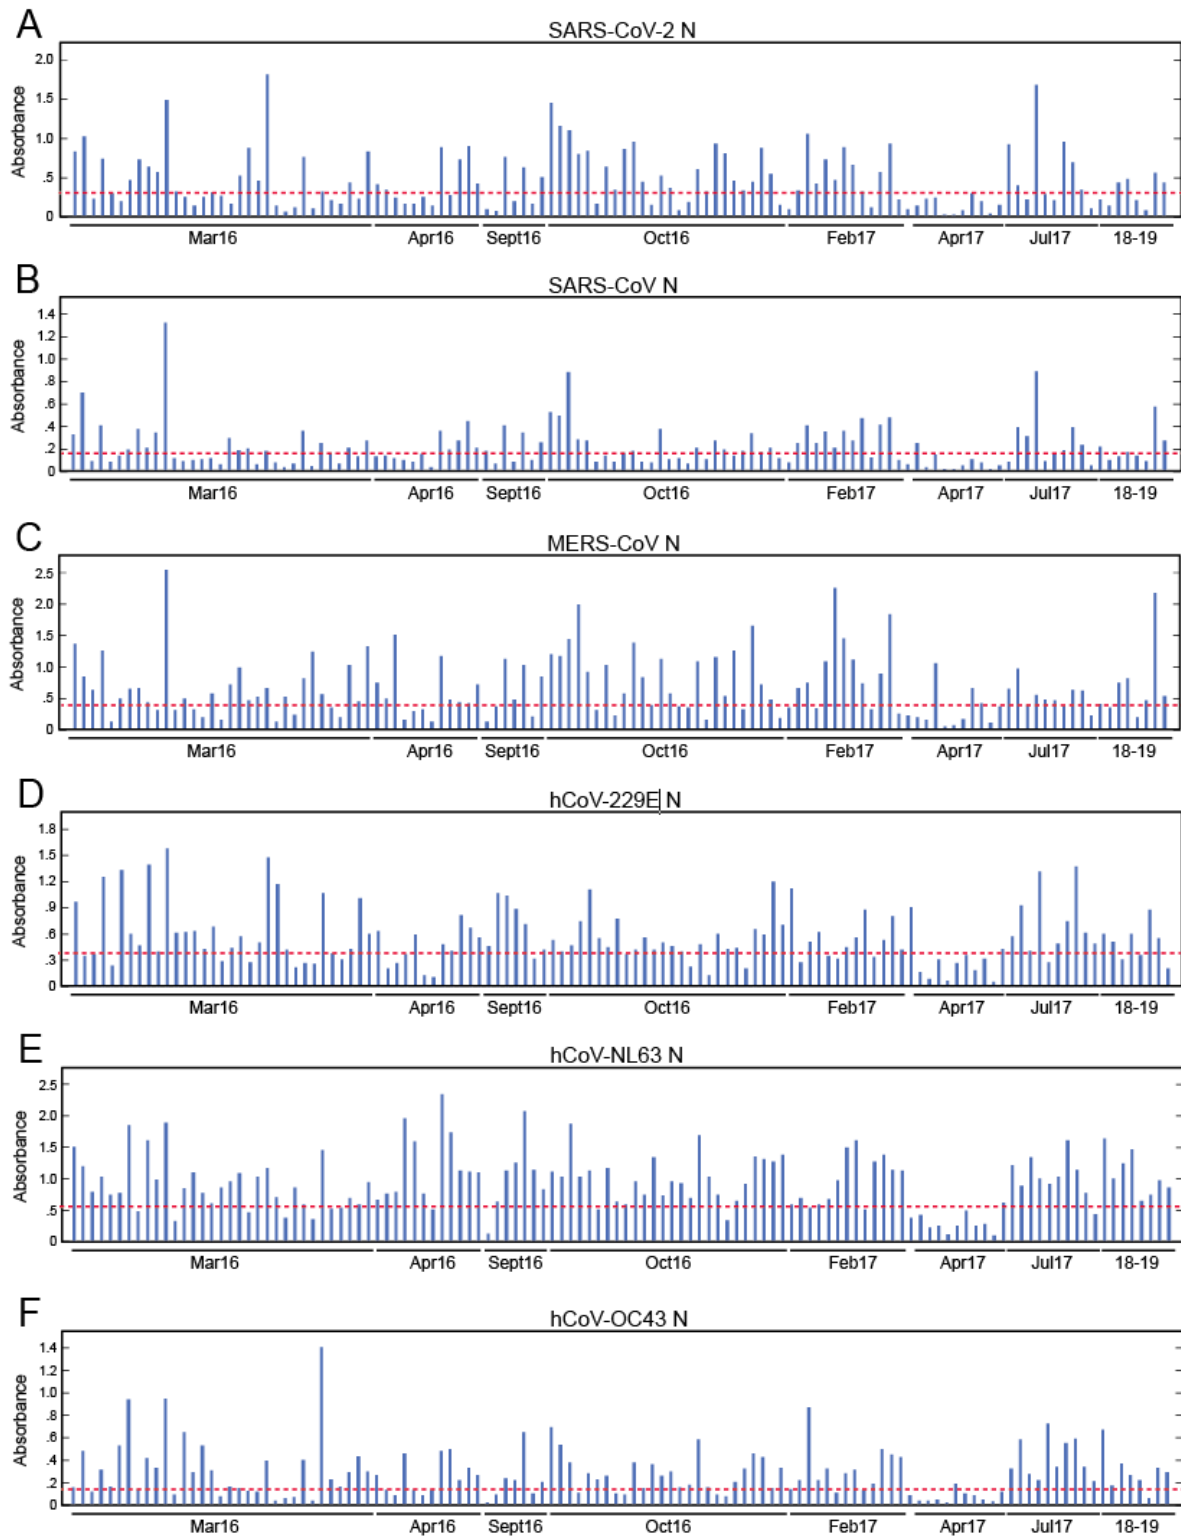

**Figure S7.** Reactivity to different coronavirus N by time of sampling. Seroreactivities in Sierra Leonean samples are plotted by time of collection. Panel A: SARS-CoV-2 N. Panel B: SARS-CoV N. Panel C: MERS-CoV N. Panel D: hCoV-229E. Panel E: hCoV-NL63. Panel F: hCoV-OC43.

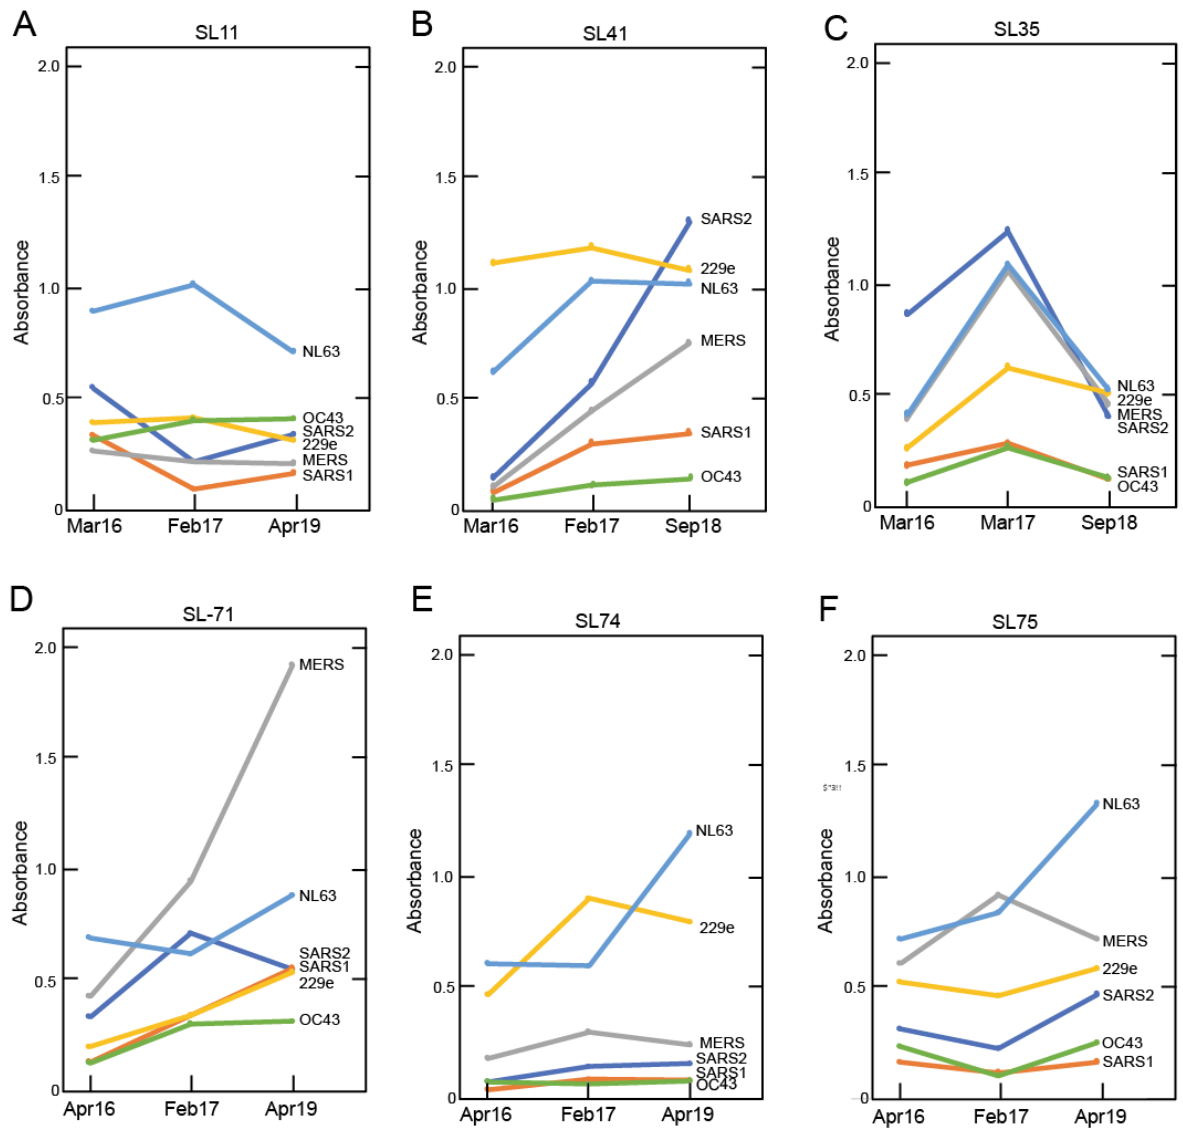

**Figure S8.** Changes in reactivity to coronaviruses in individual Sierra Leonean subjects over time. Variation in absorbance values for seroreactivity to N of SARS-CoV-2, SARS-CoV, MERS-CoV, hCoV-229E, hCoV-NL63 and hCoV-OC43. Panel A: SL11. Panel B: SL41. Panel C: SL35. Panel D: SL71. Panel E: SL74. Panel F: SL75.

**Table S1.** Reactivity of antibodies in samples from Sierra Leoneans collected prior to the CoVID-19 pandemic to coronavirus proteins.<sup>1</sup>

| SL No. | Draw Date | SARS-2 Mean OD | SARS1 Mean OD | MERS Mean OD | 229E Mean OD | NL63 Mean OD | OC43 Mean OD | SC2-RBD Mean OD | SC2-S2 Mean OD | age  | sex |
|--------|-----------|----------------|---------------|--------------|--------------|--------------|--------------|-----------------|----------------|------|-----|
| 1      | 2-Oct-16  | 0.163          | 0.096         | 0.172        | 0.312        | 1.030        | 0.100        | 0.038           | 0.316          | 7.5  | F   |
| 2      | 2-Oct-16  | 0.489          | 0.248         | 0.741        | 0.411        | 0.750        | 0.192        | 0.600           | 0.273          | 8.5  | F   |
| 3      | 27-Sep-16 | 0.092          | 0.173         | 0.102        | 0.451        | 0.116        | 0.026        | 0.062           | 0.049          | 10.0 | F   |
| 4      | 21-Feb-17 | 0.309          | 0.455         | 0.639        | 0.858        | 0.461        | 0.124        | 0.316           | 0.148          | 10.4 | F   |
| 5      | 2-Oct-16  | 1.411          | 0.513         | 1.047        | 0.519        | 1.003        | 0.659        | 0.225           | 0.152          | 11.0 | F   |
| 6      | 2-Oct-16  | 1.126          | 0.476         | 1.026        | 0.391        | 0.932        | 0.508        | 0.212           | 0.156          | 11.5 | F   |
| 7      | 14-Mar-16 | 0.115          | 0.062         | 0.206        | 0.215        | 0.782        | 0.064        | 0.115           | 0.117          | 13.0 | F   |
| 8      | 8-Apr-17  | 0.133          | 0.237         | 0.166        | 0.166        | 0.387        | 0.035        | 0.089           | 0.065          | 13.0 | F   |
| 9      | 14-Mar-16 | 0.740          | 0.347         | 0.719        | 0.263        | 0.537        | 0.384        | 0.331           | 0.190          | 14.0 | F   |
| 10     | 14-Apr-16 | 0.247          | 0.147         | 0.273        | 0.126        | 0.695        | 0.085        | 0.093           | 0.142          | 15.0 | F   |
| 11     | 12-Mar-16 | 0.857          | 0.194         | 0.401        | 0.268        | 0.419        | 0.117        | 0.074           | 0.091          | 15.0 | F   |
| 12     | 25-Apr-19 | 0.469          | 0.166         | 0.718        | 0.585        | 1.326        | 0.251        | 0.141           | 0.144          | 15.0 | F   |
| 13     | 15-Feb-17 | 0.321          | 0.238         | 0.574        | 0.274        | 0.631        | 0.210        | 0.137           | 0.109          | 15.8 | F   |
| 14     | 8-Apr-17  | 0.225          | 0.031         | 0.124        | 0.087        | 0.210        | 0.036        | 0.486           | 0.056          | 16.0 | F   |
| 15     | 9-Mar-16  | 0.223          | 0.089         | 0.547        | 0.363        | 0.719        | 0.109        | 0.106           | 0.115          | 18.0 | F   |
| 16     | 2-Oct-16  | 1.070          | 0.855         | 1.260        | 0.462        | 1.690        | 0.355        | 0.803           | 0.259          | 18.5 | F   |
| 17     | 30-Sep-16 | 0.742          | 0.395         | 0.985        | 1.010        | 1.025        | 0.221        | 0.170           | 0.219          | 18.6 | F   |
| 18     | 10-Mar-16 | 0.710          | 0.362         | 0.572        | 0.456        | 0.437        | 0.137        | 0.056           | 0.139          | 20.0 | F   |
| 19     | 12-Mar-16 | 0.447          | 0.053         | 0.445        | 0.487        | 0.932        | 0.110        | 0.030           | 0.231          | 20.0 | F   |
| 20     | 1-Apr-16  | 0.407          | 0.122         | 0.656        | 0.617        | 0.599        | 0.251        | 0.040           | 0.077          | 20.0 | F   |
| 21     | 2-Oct-16  | 0.773          | 0.274         | 1.753        | 0.728        | 0.924        | 0.103        | 0.157           | 0.178          | 20.0 | F   |
| 22     | 8-Apr-17  | 0.236          | 0.138         | 0.925        | 0.300        | 0.232        | 0.049        | 0.032           | 0.094          | 20.5 | F   |
| 23     | 20-Jul-17 | 0.895          | 0.076         | 0.565        | 0.560        | 1.095        | 0.306        | 0.027           | 0.220          | 21.4 | F   |
| 24     | 20-Jul-17 | 0.390          | 0.379         | 0.846        | 0.899        | 0.807        | 0.555        | 0.394           | 0.306          | 21.4 | F   |
| 25     | 2-Oct-16  | 0.824          | 0.267         | 0.800        | 1.081        | 1.015        | 0.269        | 0.164           | 0.144          | 25.0 | F   |
| 26     | 10-Mar-16 | 0.624          | 0.203         | 0.373        | 1.359        | 1.447        | 0.396        | 0.076           | 0.413          | 28.0 | F   |
| 27     | 9-Mar-16  | 0.725          | 0.392         | 1.102        | 1.218        | 0.925        | 0.298        | 0.452           | 0.338          | 30.0 | F   |
| 28     | 12-Mar-16 | 1.767          | 0.172         | 0.578        | 1.433        | 1.055        | 0.372        | 0.265           | 0.250          | 30.0 | F   |
| 29     | 2-Oct-16  | 0.161          | 0.078         | 0.259        | 0.536        | 0.462        | 0.215        | 0.033           | 0.062          | 30.0 | F   |
| 30     | 2-Oct-16  | 0.624          | 0.136         | 0.903        | 0.441        | 1.063        | 0.245        | 0.902           | 0.193          | 30.5 | F   |
| 31     | 11-Mar-16 | 0.302          | 0.108         | 0.501        | 0.670        | 0.553        | 0.288        | 0.156           | 0.055          | 31.0 | F   |
| 32     | 8-Apr-17  | 0.025          | 0.014         | 0.041        | 0.066        | 0.107        | 0.021        | 0.023           | 0.009          | 31.0 | F   |
| 33     | 20-Jul-17 | 0.216          | 0.303         | 0.338        | 0.401        | 1.210        | 0.265        | 0.425           | 0.110          | 31.4 | F   |
| 34     | 16-Feb-17 | 0.416          | 0.241         | 0.292        | 0.612        | 0.543        | 0.213        | 0.233           | 0.087          | 31.9 | F   |
| 35     | 12-Mar-16 | 0.141          | 0.074         | 0.100        | 1.140        | 0.635        | 0.037        | 0.012           | 0.025          | 32.0 | F   |
| 36     | 15-Apr-16 | 0.134          | 0.030         | 0.105        | 0.109        | 0.464        | 0.128        | 0.023           | 0.038          | 32.0 | F   |
| 37     | 20-Feb-17 | 0.859          | 0.347         | 1.271        | 0.443        | 1.355        | 0.271        | 0.482           | 0.156          | 32.9 | F   |
| 38     | 20-Feb-17 | 0.642          | 0.261         | 0.980        | 0.552        | 1.452        | 0.302        | 0.244           | 0.161          | 32.9 | F   |
| 39     | 10-Mar-16 | 0.551          | 0.336         | 0.266        | 0.394        | 0.898        | 0.313        | 0.065           | 0.072          | 33.0 | F   |

|    |           |       |       |       |       |       |       |       |       |       |   |
|----|-----------|-------|-------|-------|-------|-------|-------|-------|-------|-------|---|
| 40 | 25-Jul-17 | 0.932 | 0.177 | 0.327 | 0.723 | 1.448 | 0.525 | 0.071 | 0.137 | 33.4  | F |
| 41 | 28-Feb-17 | 0.217 | 0.092 | 0.217 | 0.415 | 1.019 | 0.404 | 0.091 | 0.065 | 34.0  | F |
| 42 | 9-Mar-16  | 0.291 | 0.082 | 0.096 | 0.235 | 0.675 | 0.154 | 1.069 | 0.196 | 34.0  | F |
| 43 | 25-Apr-19 | 0.198 | 0.133 | 0.168 | 0.352 | 0.585 | 0.212 | 0.209 | 0.083 | 34.1  | F |
| 44 | 14-Mar-16 | 0.105 | 0.041 | 1.083 | 0.250 | 0.317 | 0.040 | 0.017 | 0.047 | 35.0  | F |
| 45 | 8-Apr-17  | 0.023 | 0.019 | 0.052 | 0.262 | 0.232 | 0.183 | 0.029 | 0.022 | 35.00 | F |
| 46 | 2-Oct-16  | 0.331 | 0.076 | 0.193 | 0.752 | 0.574 | 0.096 | 0.027 | 0.044 | 35.0  | F |
| 47 | 2-Oct-16  | 0.844 | 0.158 | 0.501 | 0.364 | 0.537 | 0.093 | 0.421 | 0.475 | 35.5  | F |
| 48 | 2-Oct-16  | 0.930 | 0.169 | 1.215 | 0.408 | 0.870 | 0.355 | 1.281 | 0.280 | 35.5  | F |
| 49 | 10-Mar-16 | 1.445 | 1.291 | 2.235 | 1.532 | 1.707 | 0.897 | 0.670 | 0.154 | 36.0  | F |
| 50 | 11-Mar-16 | 0.257 | 0.060 | 0.128 | 0.287 | 0.778 | 0.074 | 0.033 | 0.128 | 36.0  | F |
| 51 | 25-Jul-17 | 0.675 | 0.380 | 0.554 | 1.334 | 1.035 | 0.560 | 0.298 | 0.142 | 36.4  | F |
| 52 | 2-Oct-16  | 0.431 | 0.082 | 0.729 | 0.547 | 0.672 | 0.144 | 0.154 | 0.132 | 37.5  | F |
| 53 | 15-Mar-16 | 0.161 | 0.064 | 0.160 | 0.298 | 0.484 | 0.155 | 0.082 | 0.143 | 39.0  | F |
| 54 | 8-Apr-17  | 0.083 | 0.049 | 0.135 | 0.353 | 0.447 | 0.095 | 0.011 | 0.030 | 39.0  | F |
| 55 | 2-Oct-16  | 0.148 | 0.071 | 0.335 | 0.412 | 1.214 | 0.341 | 0.022 | 0.065 | 40.0  | F |
| 56 | 20-Jul-17 | 1.639 | 0.864 | 0.474 | 1.273 | 0.899 | 0.208 | 0.168 | 0.371 | 40.4  | F |
| 57 | 2-Oct-16  | 0.514 | 0.360 | 0.992 | 0.485 | 0.658 | 0.245 | 1.892 | 0.127 | 40.5  | F |
| 58 | 25-Jul-17 | 0.337 | 0.229 | 0.539 | 0.601 | 0.706 | 0.323 | 0.209 | 0.117 | 41.4  | F |
| 59 | 14-Mar-17 | 0.097 | 0.060 | 0.193 | 0.886 | 0.351 | 0.082 | 0.037 | 0.107 | 42.0  | F |
| 60 | 20-Jul-17 | 0.278 | 0.088 | 0.410 | 0.276 | 0.829 | 0.690 | 0.054 | 0.225 | 42.3  | F |
| 61 | 30-Mar-16 | 0.223 | 0.123 | 0.386 | 0.980 | 0.541 | 0.408 | 0.119 | 0.078 | 43.0  | F |
| 62 | 30-Sep-16 | 0.190 | 0.079 | 0.410 | 0.866 | 1.140 | 0.209 | 0.140 | 0.044 | 45.6  | F |
| 63 | 2-Oct-16  | 0.361 | 0.099 | 0.501 | 0.450 | 0.867 | 0.281 | 0.047 | 0.113 | 46.5  | F |
| 64 | 30-Jul-17 | 0.099 | 0.046 | 0.187 | 0.480 | 0.393 | 0.204 | 0.026 | 0.045 | 50.4  | F |
| 65 | 2-Oct-16  | 0.080 | 0.108 | 0.319 | 0.393 | 0.842 | 0.147 | 0.135 | 0.098 | 50.5  | F |
| 66 | 5-Dec-18  | 0.422 | 0.123 | 0.652 | 0.302 | 1.122 | 0.349 | 0.053 | 0.224 | 50.5  | F |
| 67 | 14-Mar-16 | 0.308 | 0.239 | 0.492 | 1.039 | 1.311 | 1.331 | 0.136 | 0.148 | 51.0  | F |
| 68 | 2-Oct-16  | 0.177 | 0.061 | 0.301 | 0.226 | 0.622 | 0.169 | 0.102 | 0.051 | 52.5  | F |
| 69 | 2-Oct-16  | 0.587 | 0.199 | 0.956 | 0.469 | 1.534 | 0.549 | 0.080 | 0.455 | 52.7  | F |
| 70 | 30-Mar-16 | 0.805 | 0.261 | 1.158 | 0.584 | 0.852 | 0.283 | 0.262 | 0.234 | 10.0  | M |
| 71 | 13-Apr-16 | 0.335 | 0.132 | 0.427 | 0.200 | 0.691 | 0.128 | 0.555 | 0.268 | 12.0  | M |
| 72 | 25-Apr-16 | 0.268 | 0.187 | 0.411 | 0.398 | 1.566 | 0.469 | 0.187 | 0.176 | 12.0  | M |
| 73 | 24-Feb-17 | 0.556 | 0.401 | 0.771 | 0.514 | 1.246 | 0.473 | 0.164 | 0.182 | 12.8  | M |
| 74 | 16-Feb-17 | 0.709 | 0.340 | 0.945 | 0.341 | 0.617 | 0.303 | 0.529 | 0.229 | 12.8  | M |
| 75 | 13-Apr-16 | 0.234 | 0.109 | 1.330 | 0.267 | 0.721 | 0.080 | 0.060 | 0.049 | 13.0  | M |
| 76 | 21-Apr-16 | 0.860 | 0.352 | 1.030 | 0.471 | 2.117 | 0.453 | 0.435 | 0.636 | 13.0  | M |
| 77 | 16-Feb-17 | 0.459 | 0.205 | 1.988 | 0.316 | 0.876 | 0.101 | 0.106 | 0.066 | 13.8  | M |
| 78 | 27-Feb-17 | 0.906 | 0.463 | 1.616 | 0.780 | 1.034 | 0.425 | 0.368 | 0.754 | 13.9  | M |
| 79 | 25-Apr-19 | 0.079 | 0.085 | 0.402 | 0.856 | 0.671 | 0.058 | 0.063 | 0.057 | 14.2  | M |
| 80 | 15-Mar-16 | 0.419 | 0.204 | 0.901 | 0.415 | 0.622 | 0.276 | 0.114 | 0.156 | 15.0  | M |
| 81 | 25-Apr-19 | 0.548 | 0.553 | 1.918 | 0.536 | 0.882 | 0.314 | 0.357 | 0.203 | 15.0  | M |
| 82 | 2-Oct-16  | 0.316 | 0.101 | 0.120 | 0.129 | 0.934 | 0.153 | 0.027 | 0.034 | 16.5  | M |
| 83 | 10-Mar-16 | 0.245 | 0.088 | 0.430 | 0.608 | 0.761 | 0.612 | 0.037 | 0.319 | 18.0  | M |
| 84 | 10-Mar-16 | 0.308 | 0.108 | 0.265 | 0.597 | 0.290 | 0.087 | 0.143 | 0.080 | 18.0  | M |

|     |           |       |       |       |       |       |       |       |       |      |    |
|-----|-----------|-------|-------|-------|-------|-------|-------|-------|-------|------|----|
| 85  | 8-Apr-17  | 0.295 | 0.105 | 0.570 | 0.180 | 0.237 | 0.084 | 0.053 | 0.068 | 19.0 | M  |
| 86  | 7-Oct-16  | 0.143 | 0.107 | 0.154 | 0.687 | 1.249 | 0.313 | 0.060 | 0.076 | 20.1 | M  |
| 87  | 2-Oct-16  | 0.912 | 0.260 | 1.008 | 0.583 | 0.679 | 0.088 | 0.206 | 0.372 | 20.5 | M  |
| 88  | 11-Mar-16 | 0.159 | 0.289 | 0.627 | 0.430 | 0.867 | 0.155 | 0.112 | 0.123 | 22.0 | M  |
| 89  | 11-Mar-16 | 0.514 | 0.180 | 0.869 | 0.559 | 0.985 | 0.139 | 0.109 | 0.164 | 25.0 | M  |
| 90  | 7-Sep-16  | 0.880 | 0.432 | 0.362 | 0.661 | 1.006 | 0.312 | 0.572 | 0.516 | 26.0 | M  |
| 91  | 8-Apr-17  | 0.189 | 0.074 | 0.363 | 0.316 | 0.256 | 0.046 | 0.069 | 0.038 | 26.0 | M  |
| 92  | 8-Apr-17  | 0.032 | 0.016 | 0.088 | 0.059 | 0.097 | 0.028 | 0.013 | 0.004 | 27.0 | M  |
| 93  | 2-Oct-16  | 0.792 | 0.184 | 0.459 | 0.422 | 0.305 | 0.072 | 0.228 | 0.109 | 27.0 | M  |
| 94  | 3-Sep-18  | 0.218 | 0.213 | 0.347 | 0.586 | 1.482 | 0.635 | 0.081 | 0.118 | 29.4 | M  |
| 95  | 2-Oct-16  | 0.451 | 0.130 | 1.103 | 0.426 | 0.587 | 0.195 | 0.082 | 0.065 | 30.0 | M  |
| 96  | 7-Sep-19  | 0.421 | 0.261 | 0.458 | 0.199 | 0.773 | 0.275 | 0.437 | 0.193 | 32.0 | M  |
| 97  | 8-Mar-16  | 0.811 | 0.317 | 1.197 | 0.938 | 1.367 | 0.152 | 0.253 | 0.210 | 33.0 | M  |
| 98  | 9-Mar-16  | 0.196 | 0.129 | 0.431 | 1.301 | 0.696 | 0.498 | 0.108 | 0.223 | 34.0 | M  |
| 99  | 2-Oct-16  | 0.328 | 0.173 | 0.271 | 0.207 | 0.833 | 0.309 | 0.336 | 0.266 | 34.9 | M  |
| 100 | 7-Sep-16  | 0.418 | 0.199 | 0.629 | 0.548 | 0.997 | 0.255 | 0.715 | 0.407 | 35.0 | M  |
| 101 | 9-Mar-16  | 0.452 | 0.185 | 0.563 | 0.591 | 1.672 | 0.885 | 0.055 | 0.320 | 35.0 | M  |
| 102 | 2-Oct-16  | 0.440 | 0.328 | 1.447 | 0.640 | 1.221 | 0.434 | 0.246 | 0.140 | 38.5 | M  |
| 103 | 8-Apr-17  | 0.143 | 0.048 | 0.309 | 0.419 | 0.565 | 0.116 | 0.018 | 0.016 | 41.0 | M  |
| 104 | 10-Mar-16 | 0.137 | 0.095 | 0.281 | 0.617 | 0.997 | 0.276 | 0.056 | 0.122 | 42.0 | M  |
| 105 | 12-Mar-16 | 0.057 | 0.036 | 0.447 | 0.409 | 0.347 | 0.063 | 0.018 | 0.066 | 42.0 | M  |
| 106 | 3-Sep-18  | 0.140 | 0.097 | 0.306 | 0.502 | 0.903 | 0.162 | 0.062 | 0.041 | 44.5 | M  |
| 107 | 13-Apr-16 | 0.157 | 0.091 | 0.126 | 0.359 | 1.770 | 0.432 | 0.014 | 0.094 | 45.0 | M  |
| 108 | 8-Mar-16  | 0.992 | 0.676 | 0.739 | 0.346 | 1.084 | 0.454 | 0.055 | 0.264 | 45.0 | M  |
| 109 | 21-Feb-17 | 0.119 | 0.118 | 0.281 | 0.327 | 1.145 | 0.179 | 0.015 | 0.046 | 45.9 | M  |
| 110 | 10-Mar-16 | 0.249 | 0.104 | 0.166 | 0.424 | 0.698 | 0.498 | 0.056 | 0.117 | 47.0 | M  |
| 111 | 30-Sep-16 | 0.614 | 0.336 | 0.902 | 0.697 | 1.870 | 0.610 | 0.129 | 0.548 | 50.6 | M  |
| 112 | 20-Jul-17 | 0.199 | 0.142 | 0.399 | 0.482 | 0.932 | 0.321 | 0.085 | 0.114 | 52.3 | M  |
| 113 | 13-Apr-16 | 0.156 | 0.082 | 0.249 | 0.581 | 1.440 | 0.124 | 0.041 | 0.228 | 53.2 | M  |
| 114 | 28-Sep-16 | 0.076 | 0.067 | 0.311 | 1.037 | 0.571 | 0.091 | 0.073 | 0.064 | 53.5 | M  |
| 115 | 10-Feb-17 | 0.094 | 0.074 | 0.298 | 1.089 | 0.532 | 0.136 | 0.093 | 0.077 | 53.9 | M  |
| 116 | 15-Feb-17 | 1.034 | 0.396 | 0.655 | 0.499 | 0.482 | 0.818 | 0.167 | 0.410 | 54.0 | M  |
| 117 | 2-Oct-16  | 0.851 | 0.162 | 0.630 | 0.580 | 1.184 | 0.407 | 0.071 | 0.075 | 55.5 | M  |
| 118 | 2-Oct-16  | 0.536 | 0.205 | 0.409 | 1.167 | 1.143 | 0.140 | 0.233 | 0.393 | 55.5 | M  |
| 119 | 14-Mar-16 | 0.208 | 0.158 | 0.301 | 0.374 | 0.468 | 0.220 | 0.050 | 0.102 | 60.0 | M  |
| 120 | 26-Apr-16 | 0.714 | 0.266 | 0.372 | 0.793 | 1.016 | 0.212 | 0.058 | 0.317 | NR   | NR |

1. Values in cells that are filled pink are positive.
2. NR= not recorded

**Table S2.** Reactivity of antibodies in samples from United States normal blood donors to coronavirus proteins.<sup>1</sup>

|         | SARS-2  | SARS1   | MERS    | 229E    | NL63    | OC43    | SC2-RBD | SC2-S2  |
|---------|---------|---------|---------|---------|---------|---------|---------|---------|
| C19 No. | Mean OD |
| 1       | 0.978   | 0.772   | 0.082   | 1.021   | 0.507   | 0.136   | 0.936   | 0.632   |
| 2       | 1.445   | 0.824   | 0.098   | 0.913   | 0.382   | 0.063   | 2.144   | 0.813   |
| 3       | 2.058   | 1.242   | 0.431   | 0.457   | 0.439   | 0.089   | 1.812   | 0.776   |
| 4       | 0.447   | 0.289   | 0.084   | 1.130   | 0.418   | 0.137   | 0.171   | 0.492   |
| 5       | 2.350   | 1.504   | 0.166   | 1.323   | 1.891   | 0.097   | 1.673   | 0.902   |
| 6       | 0.027   | 0.037   | 0.041   | 0.302   | 0.153   | 0.103   | 0.037   | 0.026   |
| 7       | 2.593   | 1.559   | 0.546   | 1.459   | 1.844   | 0.150   | 2.007   | 0.599   |
| 8       | 0.530   | 0.267   | 0.172   | 0.847   | 0.750   | 0.366   | 0.405   | 0.493   |
| 9       | 0.801   | 0.491   | 0.144   | 0.160   | 0.258   | 0.337   | 0.747   | 0.444   |
| 10      | 2.287   | 1.479   | 0.084   | 0.197   | 0.192   | 0.083   | 2.014   | 0.881   |
| 11      | 1.312   | 0.711   | 0.063   | 0.816   | 0.303   | 0.265   | 1.227   | 0.445   |
| 12      | 0.673   | 0.365   | 0.072   | 1.120   | 0.332   | 0.046   | 0.868   | 0.403   |
| 13      | 2.347   | 1.438   | 0.114   | 1.040   | 1.438   | 0.066   | 1.893   | 1.113   |
| 14      | 1.960   | 1.167   | 0.070   | 0.780   | 0.236   | 0.087   | 1.818   | 0.833   |
| 15      | 1.351   | 0.817   | 0.072   | 1.134   | 0.507   | 0.186   | 0.991   | 0.530   |
| 16      | 1.541   | 0.969   | 0.091   | 0.783   | 1.199   | 0.226   | 1.520   | 0.535   |
| 17      | 0.967   | 0.634   | 0.042   | 1.171   | 0.073   | 0.030   | 0.953   | 0.710   |
| 18      | 0.290   | 0.153   | 0.074   | 0.922   | 0.554   | 0.055   | 0.650   | 0.543   |
| 19      | 2.179   | 1.303   | 0.695   | 0.886   | 1.916   | 0.904   | 0.785   | 0.548   |
| 20      | 1.306   | 0.815   | 0.188   | 0.137   | 0.128   | 0.036   | 1.006   | 0.768   |
| 21      | 0.031   | 0.028   | 0.083   | 0.473   | 0.802   | 0.225   | 0.006   | 0.029   |
| 22      | 0.581   | 0.306   | 0.048   | 0.511   | 0.353   | 0.084   | 0.145   | 0.322   |
| 23      | 1.738   | 0.995   | 0.131   | 1.577   | 1.320   | 0.170   | 0.973   | 0.858   |
| 24      | 0.516   | 0.253   | 0.129   | 0.352   | 0.469   | 0.134   | 0.294   | 0.165   |
| 25      | 0.809   | 0.365   | 0.111   | 0.356   | 0.955   | 0.267   | 0.238   | 0.943   |
| 26      | 2.774   | 1.745   | 0.329   | 1.078   | 1.807   | 0.246   | 1.151   | 1.410   |
| 27      | 1.548   | 0.842   | 0.181   | 0.916   | 0.597   | 0.255   | 1.432   | 0.365   |

1. Values in cells that are filled with pink are positive.



**Table S3.** Reactivity of antibodies in samples from United States normal blood donors to coronavirus proteins.<sup>1</sup>

|        | SARS-2  | SARS1   | MERS    | 229E    | NL63    | OC43    | SC2-RBD | SC2-S2  |
|--------|---------|---------|---------|---------|---------|---------|---------|---------|
| US No. | Mean OD |
| P8-01  | 0.066   | 0.026   | 0.085   | 0.149   | 0.312   | 0.104   | 0.003   | 0.009   |
| P8-02  | 0.087   | 0.068   | 0.053   | 0.514   | 0.332   | 0.190   | 0.008   | 0.114   |
| P8-03  | 0.227   | 0.120   | 0.229   | 0.420   | 0.503   | 0.534   | 0.015   | 0.117   |
| P8-04  | 0.054   | 0.073   | 0.965   | 0.938   | 1.647   | 0.378   | 0.009   | 0.097   |
| P8-05  | 0.051   | 0.057   | 0.068   | 0.256   | 0.254   | 0.185   | 0.008   | 0.128   |
| P8-06  | 0.081   | 0.149   | 0.072   | 0.170   | 0.480   | 0.223   | 0.010   | 0.043   |
| P8-07  | 0.869   | 0.354   | 0.118   | 0.581   | 0.397   | 0.104   | 0.012   | 0.085   |
| P8-08  | 0.151   | 0.103   | 0.194   | 0.494   | 0.442   | 0.161   | 0.016   | 0.041   |
| P8-09  | 0.069   | 0.033   | 0.098   | 0.300   | 0.826   | 0.424   | 0.016   | 0.042   |
| P8-10  | 0.016   | 0.012   | 0.070   | 0.250   | 1.184   | 0.360   | 0.009   | 0.073   |
| P8-11  | 0.348   | 0.090   | 0.394   | 1.256   | 1.522   | 0.201   | 0.094   | 0.107   |
| P8-12  | 0.036   | 0.018   | 0.116   | 0.296   | 0.402   | 0.246   | 0.003   | 0.011   |
| P8-13  | 0.803   | 0.040   | 0.052   | 1.318   | 0.684   | 0.518   | 0.010   | 0.476   |
| P8-14  | 0.096   | 0.238   | 0.091   | 0.602   | 1.014   | 0.561   | 0.012   | 0.079   |
| P8-15  | 0.494   | 0.111   | 0.099   | 1.377   | 1.149   | 0.246   | 0.984   | 0.062   |
| P8-16  | 0.045   | 0.049   | 0.441   | 0.307   | 0.346   | 0.024   | 0.032   | 0.077   |
| P8-17  | 0.090   | 0.040   | 0.086   | 0.988   | 0.531   | 0.575   | 0.035   | 0.023   |
| P8-18  | 0.046   | 0.048   | 0.298   | 0.699   | 0.492   | 0.558   | 0.009   | 0.035   |
| P8-19  | 0.038   | 0.016   | 0.067   | 0.370   | 0.684   | 0.093   | 0.007   | 0.022   |
| P8-20  | 0.098   | 0.071   | 0.185   | 1.140   | 0.728   | 0.342   | 0.007   | 0.075   |
| P8-21  | 0.196   | 0.028   | 0.066   | 0.343   | 0.469   | 0.050   | 0.010   | 0.048   |
| P8-22  | 0.266   | 0.149   | 0.109   | 0.666   | 0.455   | 0.313   | 0.023   | 0.064   |
| P8-23  | 0.271   | 0.174   | 0.441   | 0.327   | 1.093   | 0.415   | 0.142   | 0.197   |
| P8-24  | 0.188   | 0.063   | 0.120   | 0.666   | 0.914   | 0.118   | 0.014   | 0.049   |
| P8-25  | 0.060   | 0.066   | 0.120   | 0.419   | 0.669   | 0.263   | 0.012   | 0.097   |
| P8-26  | 0.029   | 0.155   | 0.190   | 0.538   | 0.611   |         | 0.023   | 0.030   |
| P8-27  | 0.023   | 0.158   | 0.970   | 0.578   | 0.889   | 1.002   | 0.023   | 0.155   |
| P8-28  | 0.037   | 0.045   | 0.126   | 0.834   | 0.328   | 0.136   | 0.030   | 0.034   |
| P8-29  | 0.025   | 0.025   | 0.069   | 0.513   | 1.266   | 0.113   | 0.016   | 0.039   |
| P8-30  | 0.040   | 0.054   | 0.100   | 0.704   | 0.796   | 0.179   | 0.019   | 0.040   |
| P8-31  | 0.251   | 0.091   | 0.094   | 1.225   | 1.098   | 0.323   | 0.030   | 0.161   |
| P8-32  | 0.066   | 0.038   | 0.055   | 0.911   | 0.712   | 0.315   | 0.010   | 0.024   |
| P8-33  | 0.157   | 0.119   | 0.106   | 0.891   | 1.331   | 0.176   | 0.045   | 0.111   |
| P8-34  | 0.384   | 0.064   | 0.182   | 0.580   | 0.547   | 0.125   | 0.047   | 0.058   |
| P8-35  | 0.103   | 0.085   | 0.223   | 1.160   | 0.697   | 0.133   | 0.018   | 0.067   |
| P8-36  | 0.076   | 0.040   | 0.222   | 0.471   | 0.531   | 0.059   | 0.012   | 0.106   |
| P8-37  | 0.078   | 0.037   | 0.141   | 0.762   | 0.224   | 0.042   | 0.016   | 0.082   |
| P8-38  | 0.429   | 0.173   | 0.214   | 1.154   | 0.482   | 0.138   | 0.088   | 0.312   |
| P8-39  | 0.040   | 0.105   | 0.089   | 0.994   | 0.329   | 0.331   | 0.016   | 0.078   |



|       |       |       |       |       |       |       |       |       |
|-------|-------|-------|-------|-------|-------|-------|-------|-------|
| P8-40 | 0.039 | 0.035 | 0.417 | 0.486 | 0.466 | 0.262 | 0.009 | 0.027 |
| P9-01 | 0.082 | 0.078 | 0.076 | 1.144 | 0.940 | 1.031 | 0.009 | 0.125 |
| P9-02 | 0.017 | 0.012 | 0.033 | 0.288 | 0.043 | 0.011 | 0.006 | 0.010 |
| P9-03 | 0.042 | 0.021 | 0.052 | 0.092 | 0.261 | 0.073 | 0.021 | 0.042 |

|       |       |       |       |       |       |       |       |       |
|-------|-------|-------|-------|-------|-------|-------|-------|-------|
| P9-04 | 0.038 | 0.020 | 0.047 | 0.087 | 0.241 | 0.068 | 0.016 | 0.037 |
| P9-05 | 0.011 | 0.002 | 0.025 | 0.009 | 0.070 | 0.005 | 0.001 | 0.003 |
| P9-06 | 0.019 | 0.014 | 0.015 | 0.052 | 0.065 | 0.021 | 0.004 | 0.007 |
| P9-07 | 0.082 | 0.056 | 0.247 | 0.337 | 0.336 | 0.173 | 0.028 | 0.092 |
| P9-08 | 0.056 | 0.042 | 0.188 | 0.284 | 0.284 | 0.136 | 0.021 | 0.059 |
| P9-09 | 0.054 | 0.045 | 0.208 | 0.270 | 0.293 | 0.144 | 0.020 | 0.061 |
| P9-10 | 0.018 | 0.021 | 0.021 | 0.175 | 0.106 | 0.049 | 0.006 | 0.016 |
| P9-11 | 0.024 | 0.018 | 0.021 | 0.100 | 0.084 | 0.030 | 0.007 | 0.014 |
| P9-12 | 0.036 | 0.029 | 0.174 | 0.203 | 0.208 | 0.093 | 0.011 | 0.030 |
| P9-13 | 0.037 | 0.031 | 0.171 | 0.188 | 0.203 | 0.100 | 0.013 | 0.034 |
| P9-14 | 0.035 | 0.027 | 0.151 | 0.198 | 0.187 | 0.100 | 0.014 | 0.030 |
| P9-15 | 0.043 | 0.033 | 0.179 | 0.232 | 0.222 | 0.119 | 0.017 | 0.039 |
| P9-16 | 0.024 | 0.011 | 0.033 | 0.059 | 0.326 | 0.084 | 0.018 | 0.049 |
| P9-17 | 0.029 | 0.015 | 0.041 | 0.081 | 0.397 | 0.108 | 0.023 | 0.067 |
| P9-18 | 0.023 | 0.011 | 0.031 | 0.061 | 0.310 | 0.081 | 0.016 | 0.050 |
| P9-19 | 0.274 | 0.049 | 0.051 | 0.200 | 0.604 | 0.118 | 0.014 | 0.112 |
| P9-20 | 0.024 | 0.013 | 0.031 | 0.053 | 0.301 | 0.076 | 0.017 | 0.045 |
| P9-21 | 0.033 | 0.029 | 0.088 | 0.241 | 0.648 | 0.140 | 0.022 | 0.073 |
| P9-22 | 0.021 | 0.015 | 0.086 | 0.420 | 0.702 | 0.072 | 0.006 | 0.005 |
| P9-23 | 0.080 | 0.438 | 0.135 | 0.144 | 0.861 | 0.123 | 0.063 | 0.121 |
| P9-36 | 0.050 | 0.010 | 0.024 | 0.109 | 0.821 | 1.157 | 0.008 | 0.054 |
| P9-25 | 0.018 | 0.033 | 0.030 | 0.935 | 0.785 | 0.068 | 0.011 | 0.300 |
| P9-26 | 0.012 | 0.021 | 0.049 | 0.068 | 0.310 | 0.078 | 0.007 | 0.029 |
| P9-28 | 0.003 | 0.007 | 0.024 | 0.134 | 0.556 | 0.289 | 0.004 | 0.003 |
| P9-29 | 0.017 | 0.019 | 0.068 | 0.289 | 0.228 | 0.279 | 0.012 | 0.011 |
| P9-30 | 0.014 | 0.021 | 0.039 | 0.728 | 0.460 | 0.263 | 0.013 | 0.058 |
| P9-31 | 0.035 | 0.021 | 0.047 | 0.174 | 0.275 | 0.048 | 0.010 | 0.037 |
| P9-32 | 0.075 | 0.042 | 0.055 | 0.523 | 0.695 | 0.286 | 0.006 | 0.051 |
| P9-27 | 0.008 | 0.010 | 0.030 | 0.442 | 0.211 | 0.139 | 0.009 | 0.035 |
| P9-34 | 0.045 | 0.016 | 0.088 | 0.219 | 0.238 | 0.031 | 0.006 | 0.012 |
| P9-35 | 0.045 | 0.015 | 0.101 | 0.201 | 0.266 | 0.030 | 0.003 | 0.011 |
| P9-36 | 0.074 | 0.019 | 0.036 | 0.168 | 0.605 | 0.966 | 0.012 | 0.050 |
| P9-37 | 0.070 | 0.017 | 0.033 | 0.159 | 0.593 | 0.888 | 0.011 | 0.046 |
| P9-38 | 0.111 | 0.062 | 0.155 | 0.626 | 0.814 | 0.078 | 0.010 | 0.029 |
| P9-39 | 0.103 | 0.057 | 0.137 | 0.640 | 0.815 | 0.081 | 0.010 | 0.027 |
| P9-40 | 0.079 | 0.018 | 0.028 | 0.186 | 0.646 | 0.887 | 0.014 | 0.046 |

1. Values in cells that are filled with pink are positive.

**Table S4.** Distribution of samples from Sierra Leoneans with positive serology for various coronaviruses by age.

|              |       | SARS-2 |      | SARS1 |      | MERS  |      | 229E  |      | NL63  |      | OC43  |      | Total |
|--------------|-------|--------|------|-------|------|-------|------|-------|------|-------|------|-------|------|-------|
| Age Category |       | n      | %    | n     | %    | n     | %    | n     | %    | n     | %    | n     | %    | n     |
| 1.00         | <20   | 17.00  | 0.52 | 19.00 | 0.58 | 22.00 | 0.67 | 19.00 | 0.58 | 26.00 | 0.79 | 18.00 | 0.55 | 33.00 |
| 2.00         | 20-30 | 16.00  | 0.70 | 11.00 | 0.48 | 16.00 | 0.70 | 20.00 | 0.87 | 17.00 | 0.74 | 14.00 | 0.61 | 23.00 |
| 3.00         | 31-40 | 19.00  | 0.56 | 14.00 | 0.41 | 17.00 | 0.50 | 25.00 | 0.74 | 28.00 | 0.82 | 25.00 | 0.74 | 34.00 |
| 4.00         | 41-49 | 3.00   | 0.21 | 2.00  | 0.14 | 4.00  | 0.29 | 11.00 | 0.79 | 12.00 | 0.86 | 11.00 | 0.79 | 14.00 |
| 5.00         | ≥50   | 6.00   | 0.40 | 5.00  | 0.33 | 6.00  | 0.40 | 13.00 | 0.87 | 11.00 | 0.73 | 11.00 | 0.73 | 15.00 |

**Table S5.** Distribution of samples from Sierra Leoneans with positive serology for various coronaviruses by sex.

|   |    | SARS1 |    | MERS  |    | 229E  |    | NL63  |    | OC43  |    | Total |    |
|---|----|-------|----|-------|----|-------|----|-------|----|-------|----|-------|----|
|   | n  | %     | n  | %     | n  | %     | n  | %     | n  | %     | n  | n     |    |
| M | 25 | 0.500 | 23 | 0.460 | 28 | 0.560 | 38 | 0.760 | 41 | 0.820 | 33 | 0.660 | 50 |
| F | 36 | 0.522 | 28 | 0.406 | 37 | 0.536 | 50 | 0.725 | 53 | 0.768 | 46 | 0.667 | 69 |

**Table S6.** Neutralization of SARS-CoV2 or MERS-CoV pseudoviruses by antibodies from blood collected from Sierra Leoneans prior to the COVID-19 pandemic.

| <b>Pseudovirus</b> | <b>Number of samples</b> | <b>Positive samples (%)</b> |
|--------------------|--------------------------|-----------------------------|
| SARS-CoV-2         | 47                       | 12 (25.5)                   |
| MERS-CoV           | 30                       | 10 (33.3)                   |
